# Supplementary material for: Global scenarios of anthropogenic mercury emissions
Source: Copernicus journal article supplement (doi:10.5194/acp-24-7385-2024), 2024-06-27
Supplement: Supplementary file 2 [file acp-24-7385-2024-supplement.zip]

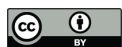

## *Supplement of*

# **Global scenarios of anthropogenic mercury emissions**

**Flora Maria Brocza et al.**

*Correspondence to:* Flora Maria Brocza ([brocza@iiasa.ac.at](mailto:brocza@iiasa.ac.at))

- [acp-24-7385-2024-supplement-title-page.pdf](#)
- [2023-ACP\\_SI\\_ScenarioData.xlsx](#)
- [egusphere-2024-41-supplement-version4-2.pdf](#)

The copyright of individual parts of the supplement might differ from the article licence.
